# Supplementary material for: Cataract-causing mutation S228P promotes βB1-crystallin aggregation and degradation by separating two interacting loops in C-terminal domain
Source: PubMed Central journal article supplement (PMC4930773; doi:10.1007/s13238-016-0284-3), 2016-06-18
Supplement: 13238_2016_284_MOESM1_ESM.pdf [file 13238_2016_284_MOESM1_ESM.pdf]

## Supplementary Materials

### **Cataract-causing mutation S228P promotes $\beta$ B1-crystallin aggregation and degradation by separating two interacting loops in the C-terminal domain**

Liang-Bo Qi<sup>1</sup>, Li-Dan Hu<sup>1</sup>, Huihui Liu, Hai-Yun Li, Xiao-Yao Leng, Yong-Bin Yan<sup>2</sup>

State Key Laboratory of Membrane Biology, School of Life Sciences, Tsinghua University, Beijing  
100084, China

<sup>1</sup> These authors contributed equally to this work.

<sup>2</sup> To whom all correspondence should be addressed: Dr. Yong-Bin Yan, School of Life Sciences,  
Tsinghua University, Beijing 100084, China. Phone: +86-10-6278-3477; Fax: +86-10-6277-2245;  
E-mail: [ybyan@tsinghua.edu.cn](mailto:ybyan@tsinghua.edu.cn).

**Short Title:** S228P promotes  $\beta$ B1-crystallin aggregation and degradation

**A**

|           |     |                           |
|-----------|-----|---------------------------|
| GA_HUMAN  | 166 | SLRRVTDLY-----            |
| GB_HUMAN  | 167 | SLRRVMDLY-----            |
| GC_HUMAN  | 166 | SLRRVVDLY-----            |
| GD_HUMAN  | 166 | SLRRVIDFS-----            |
| GS_HUMAN  | 172 | SFRRIVS-----              |
| BA4_HUMAN | 190 | SIRRIQQ-----              |
| BA2_HUMAN | 191 | SIRRVQH-----              |
| BA1_HUMAN | 209 | SIRRIQQ-----              |
| BB3_HUMAN | 193 | SVRRIRDQKWHKRGFPSS-----   |
| BB2_HUMAN | 186 | SVRRIRDMQWHQRGAFHPSN----- |
| BB1_HUMAN | 228 | SLRRLRDKQWHLEGSFPVLATEPPK |
| BB1_CHICK | 215 | SIRRIRDMQWDQKGTf-VTPEAPS  |
| BB1_PIG   | 225 | AVRRLRDRQWHREGCFPVLAAEPPK |
| BB1_BOVIN | 229 | AVRRLRDRQWHREGCFPVLAAEPPK |
| BB1_MOUSE | 226 | AVRRLRDRQWHQEGCFPVLTAEPPK |

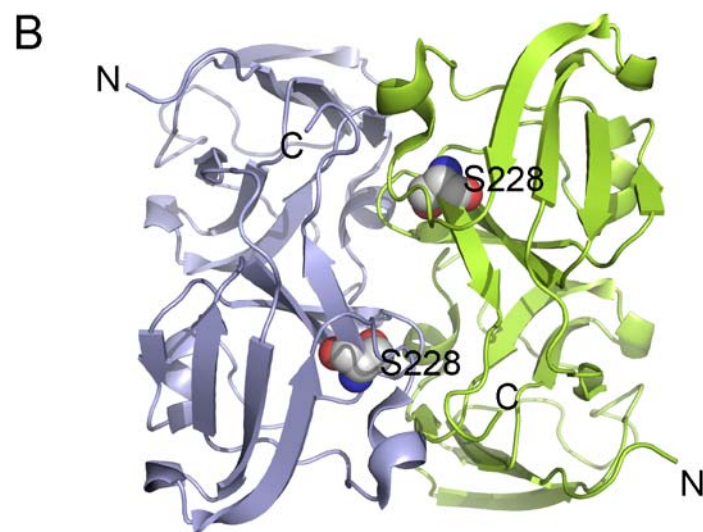

**Supplementary Figure S1. S228 is the first residue of the last  $\beta$ -strand at the C-terminus.** (A) Sequence alignment of the C-terminus of various human  $\beta/\gamma$ -crystallins and  $\beta$ B1 from various species. (B) Crystal structure of the truncated human  $\beta$ B1 (PDB ID: 1OKI). S228 is highlighted by the sphere model. N and C represent the N-terminus and C-terminus, respectively.

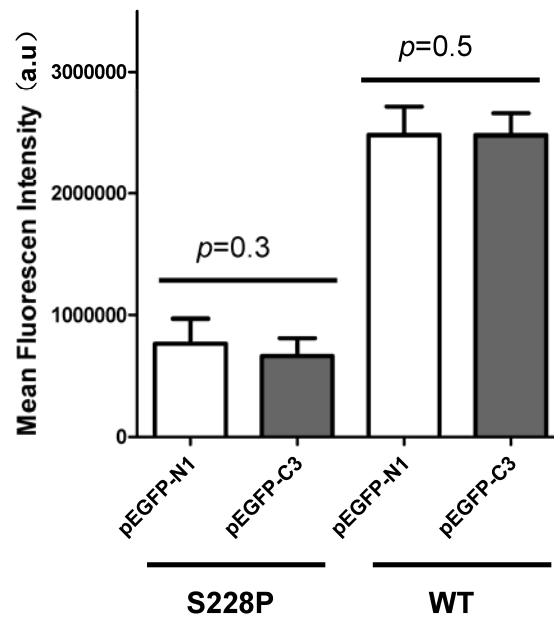

**Supplementary Figure S2. A comparison of the expression level of proteins with GFP tagged at the N- or C-terminus.** The mean fluorescence intensity was obtained by measuring the average fluorescence intensity of at least 10 transfected cells. The fluorescence intensity was determined by ImageJ. No significant difference was observed between the two types of fused proteins. The difference between the WT and mutated proteins was proximately caused by the degradation-prone property of the mutant.

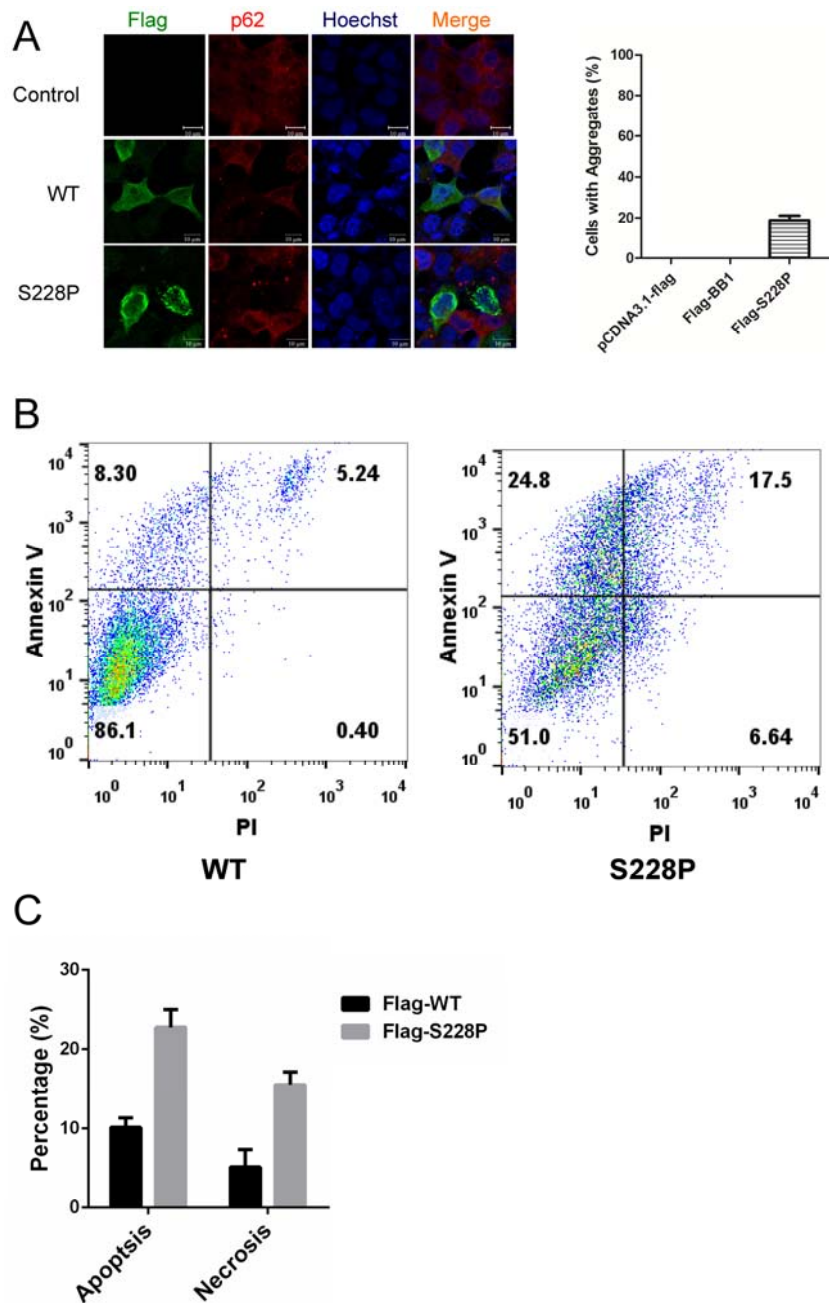

**Supplementary Figure S3. The S228P mutation of  $\beta$ B1 induces cell death.** (A) Proteins tagged by Flag at the N-terminus had similar intracellular distributions to proteins tagged by GFP at the N-terminus (Figure 1). The left panel shows the representative confocal images, while the right panel shows the quantitative analysis of cells containing crystallin aggregates. (B) Representative flow cytometry profiles of cells double stained by annexin V and PI. (C) Quantitative analysis of the percentages of apoptotic and necrotic cells. The presented data were from three independent experiments.

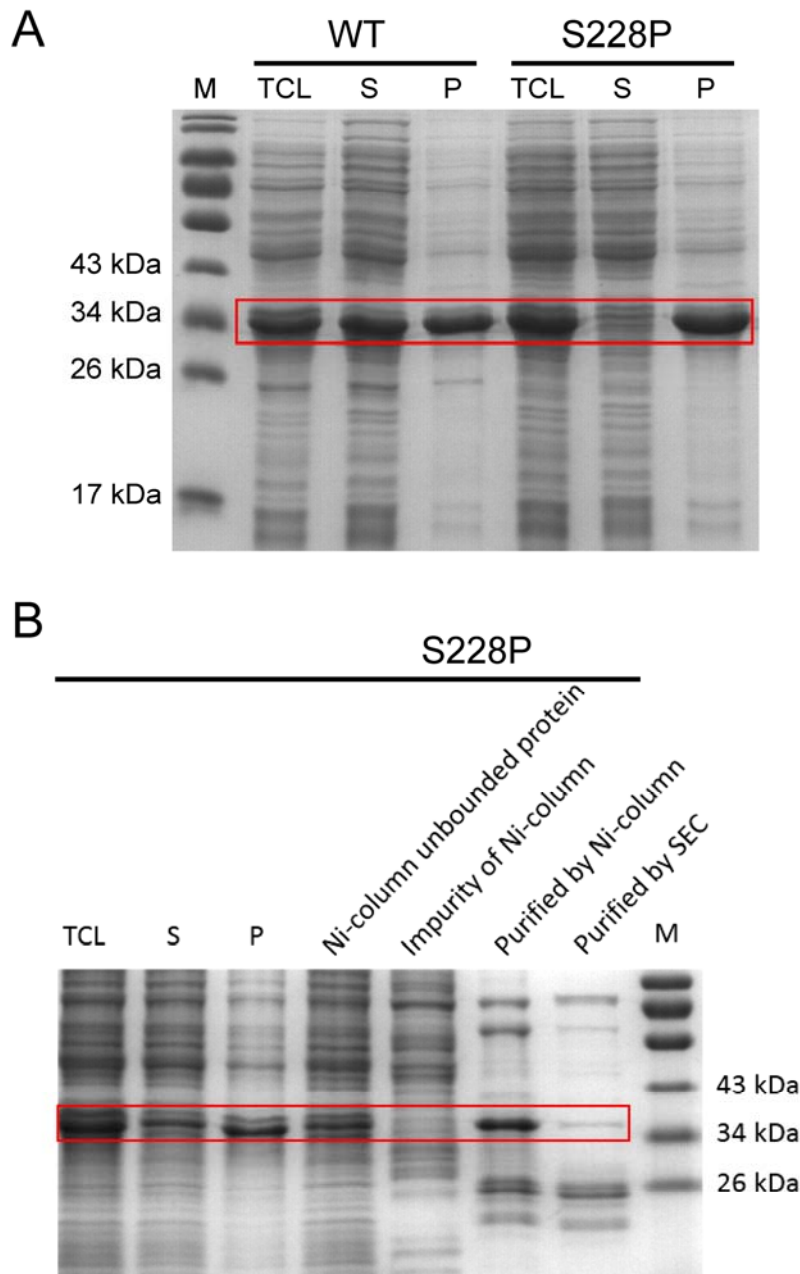

**Supplementary Figure S4. The S228P mutation promotes inclusion body formation in *E. coli* cells.** (A) SDS-PAGE analysis of overexpressed WT and mutated  $\beta$ B1 in *E. coli* cells cultured at 37°C. (B) SDS-PAGE analysis of overexpressed S228P in *E. coli* cells cultured at 12°C. TCL, total cell lysates; S, supernatant; P, precipitation; M, marker. Positions of the target proteins are highlighted by red box.

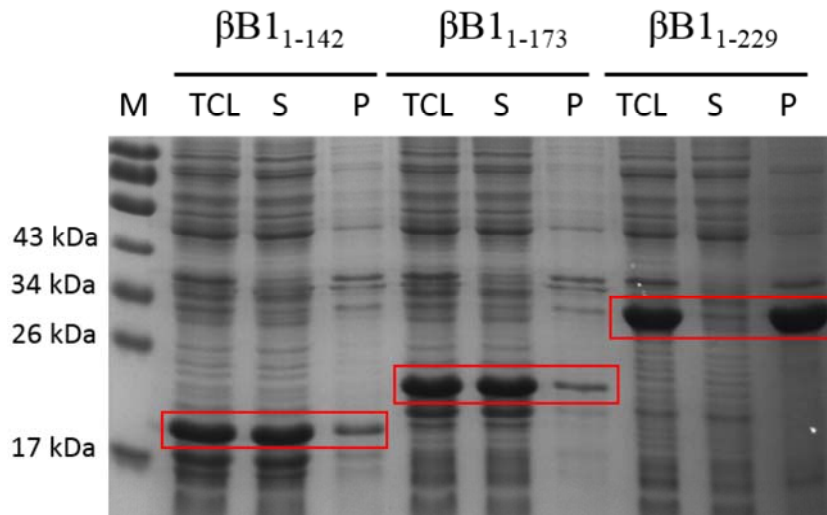

**Supplementary Figure S5. SDS-PAGE analysis of overexpressed  $\beta B1$  N-terminal fragments in *E. coli* cells.** Positions of the target proteins are highlighted by red box. TCL, total cell lysates; S, supernatant; P, precipitation; M, marker.

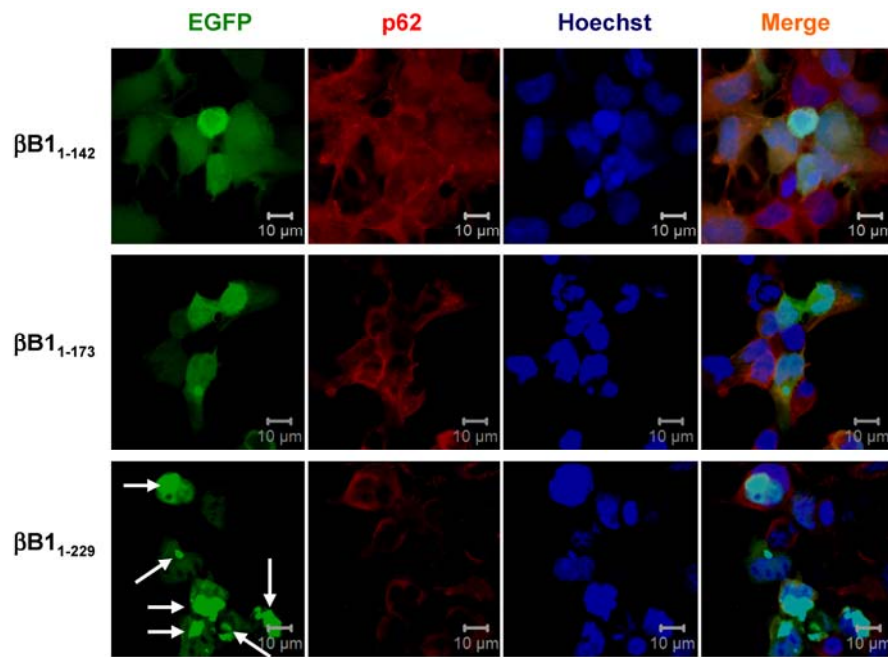

**Supplementary Figure S6. Representative confocal images of  $\beta B1$  proteolytic fragments expressed in the HEK 293T cells.** The recombinant plasmids were constructed using pEGFP-C3. The truncated  $\beta B1$  proteins were visualized by the tagged GFP (green). The aggregates were recognized by the marker protein p62 (red). The nucleus was stained by Hoechst 33342 (blue). Positions of the aggregates are highlighted by white arrows.

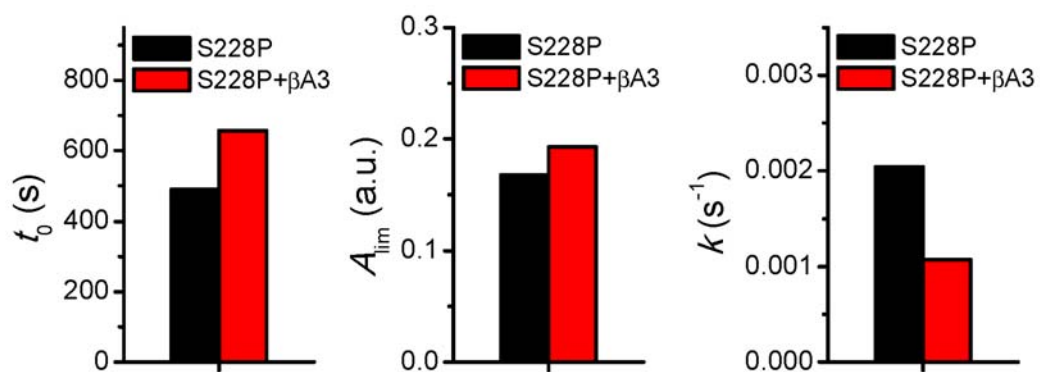

**Supplementary Figure S7. Kinetic parameters of S228P aggregation in the presence and absence of  $\beta$ A3 at 37°C.** The kinetic parameters were obtained by fitting the raw data shown in Figure 3G by the first-order aggregation kinetics.  $t_0$ , lag time;  $A_{lim}$ , turbidity (absorbance at 400 nm) at infinite time;  $k$ , aggregation rate.



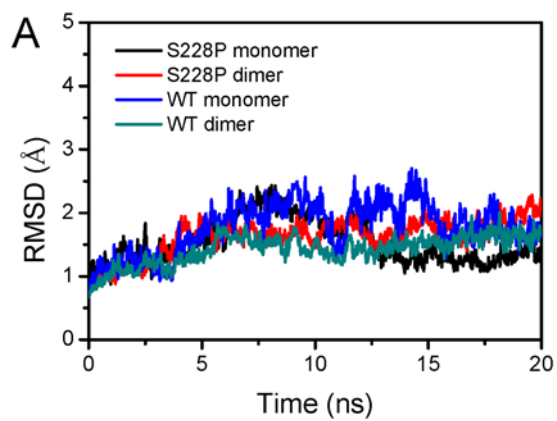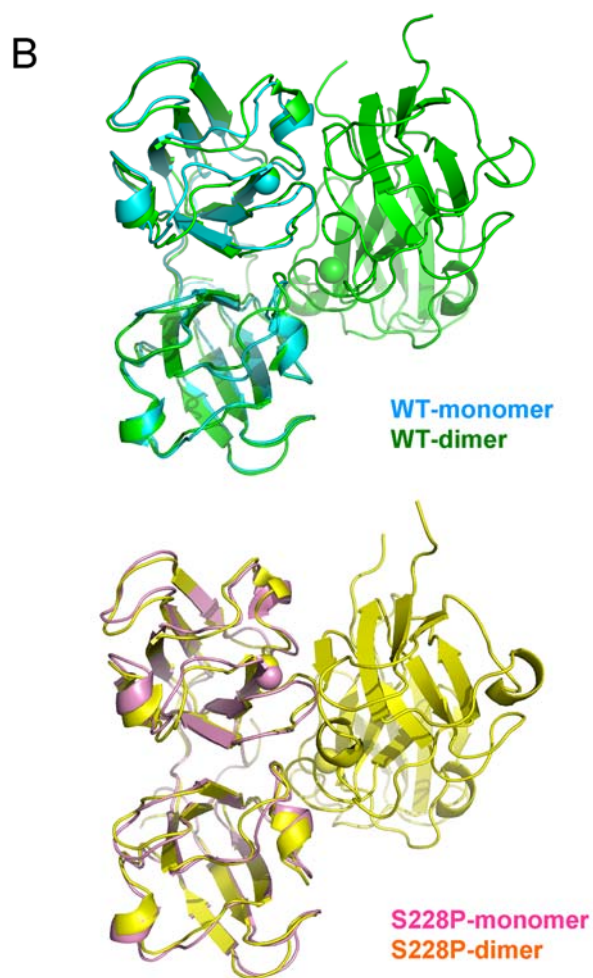

**Supplementary Figure S8. Structural variations during MD simulations.** (A) Time-course changes of the RMSD values during MD simulations. (B) A comparison of the last frame of the simulated dimeric and monomeric structures.

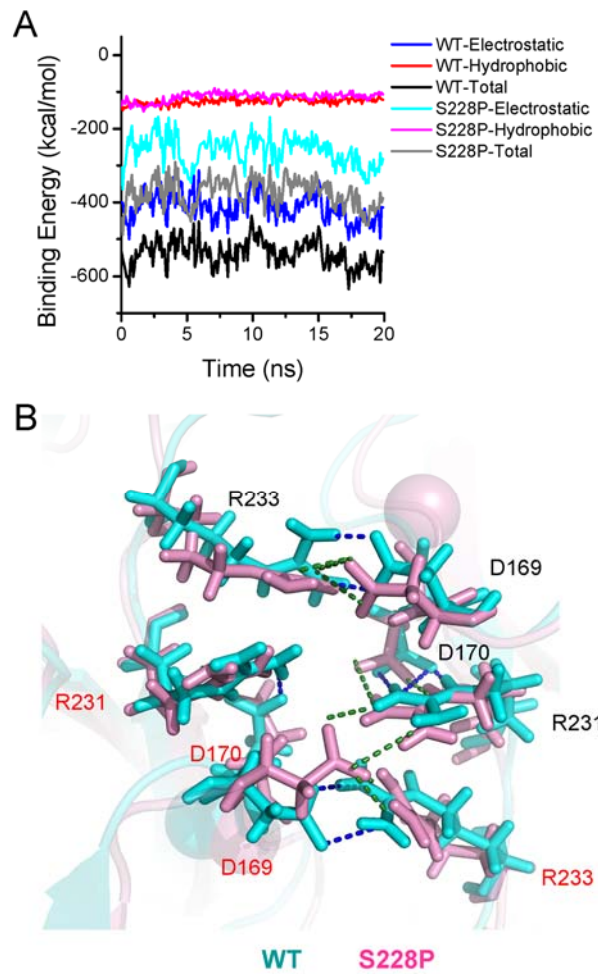

**Supplementary Figure S9. Changes in subunit binding energy and interface structure caused by the S228P mutation.** (A) Time-course change in subunit binding energy during MD simulations. (B) A comparison of the major H-bonding network forming the subunit interface. The positions of C $\alpha$  atoms of residue 228 are shown in spheres.

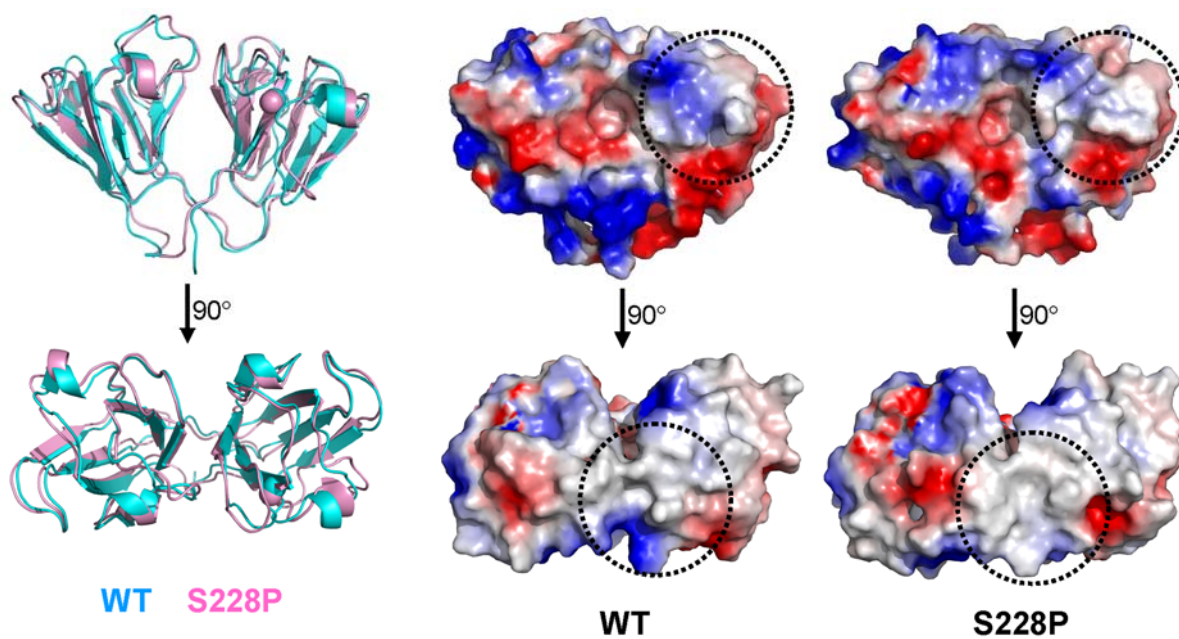

**Supplementary Figure S10. A comparison of the simulated monomeric structures and surface electrostatic potentials of the WT and S228P mutated proteins. Typical areas with changes in surface electrostatic potentials are indicated by dotted circles.**

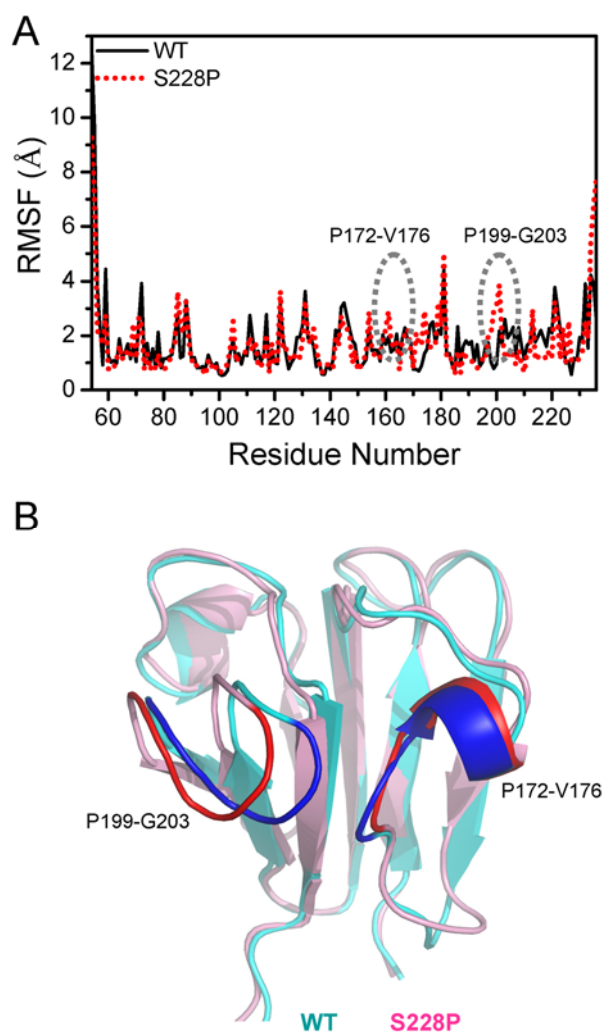

**Supplementary Figure S11. Identification of regions with large structural fluctuations.** (A) Time-course change in RMSF values during simulations. The circles show the regions that had large fluctuations in the mutant but not in the WT protein. (B) Positions of the regions with large structural fluctuations caused by the mutation. In the WT protein, the two regions form interacting loops to shield the hydrophobic core of the C-terminal domain from solvent access.
